# Supplementary material for: How imperfect mixing and differential diffusion accelerate the rate of nonlinear reactions in microfluidic channels
Source: Royal Society of Chemistry journal article supplement (doi:10.1039/c6cp00224b), 2016-01-01
Supplement: c6cp00224b1.pdf [file c6cp00224b1.pdf]

## SUPPLEMENTARY MATERIAL

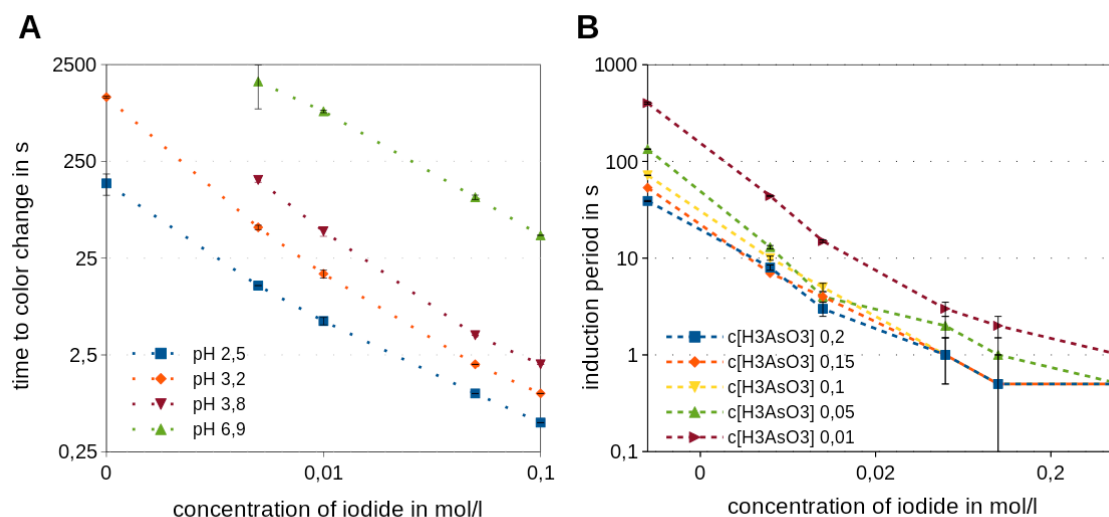

**Fig. S1.** Induction period of the iodate-arsenous acid clock reaction in a 96 well microtiter plate under different conditions. (A) Induction period at different pH values as a function of the inducer concentration KI for a constant arsenous acid concentration of 0.05 mol/l in a double logarithmic plot. (B) Induction period for different arsenous acid concentrations as a function of the inducer concentration KI for a constant pH value of 3.8 in a double logarithmic plot. The iodate concentration is 0.15 mol/l in all cases.

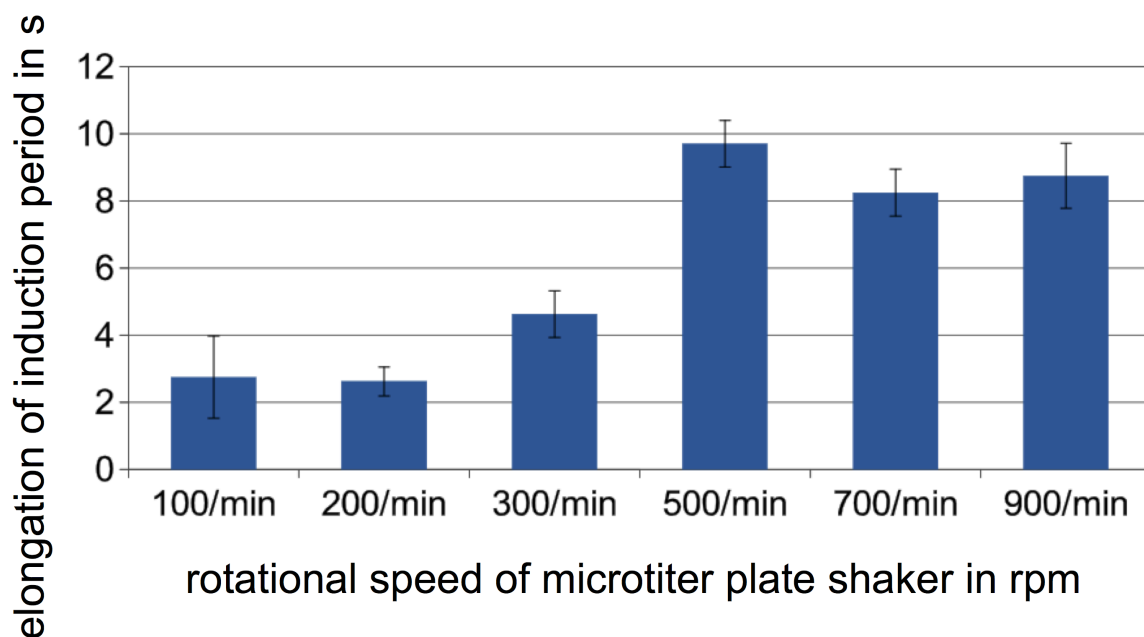

**Fig. S2.** Induction period of the iodate-arsenous acid clock reaction at different rotational speeds of the 96 well plate shaker. The elongation of the induction period compared to non-shaken samples are shown. The induction period increases with increasing rotational speed and reaches saturation for values above 500 rotations per minute.

**A**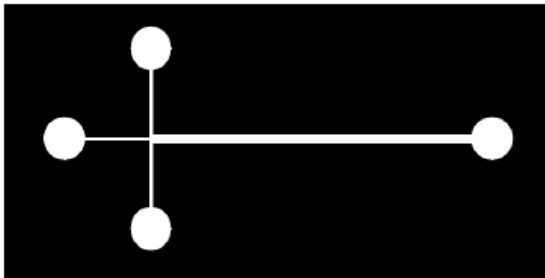**B**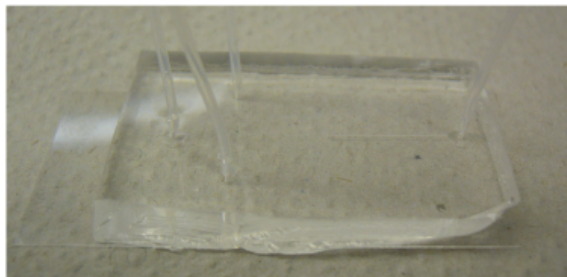

**Fig. S3.** Microfluidic channel. (A) Layout of the microfluidic channel. (B) Photograph of the microfluidic channel with Teflon tubing connected to the inlet.

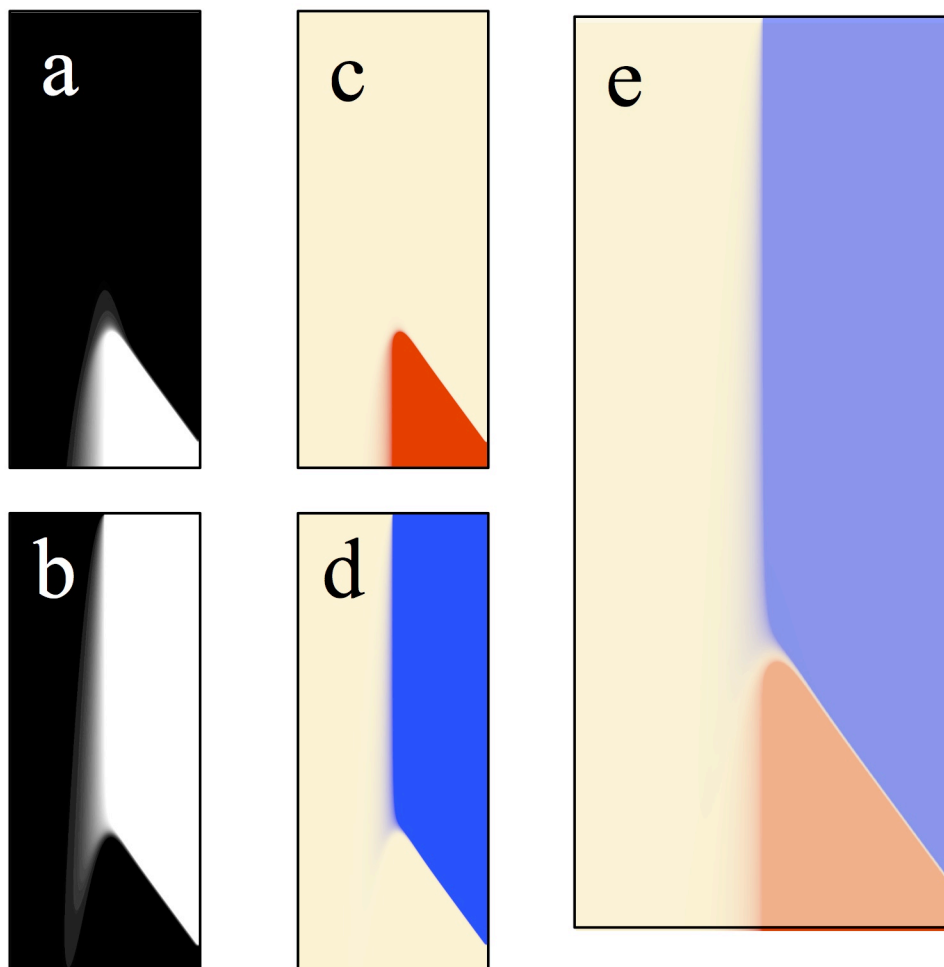

**Fig. S4.** Construction of Fig. 4. The numerical simulation yields two concentration fields for the space-time behavior of the autocatalytic specie  $B$  and the substrate  $A$  displayed as grayscale images in (A) and (B), respectively, where white represent high and black low concentrations. These images are re-colored as in (C) and (D), and finally superimposed as shown in (E). Figure S4E corresponds to the Fig. 4B.

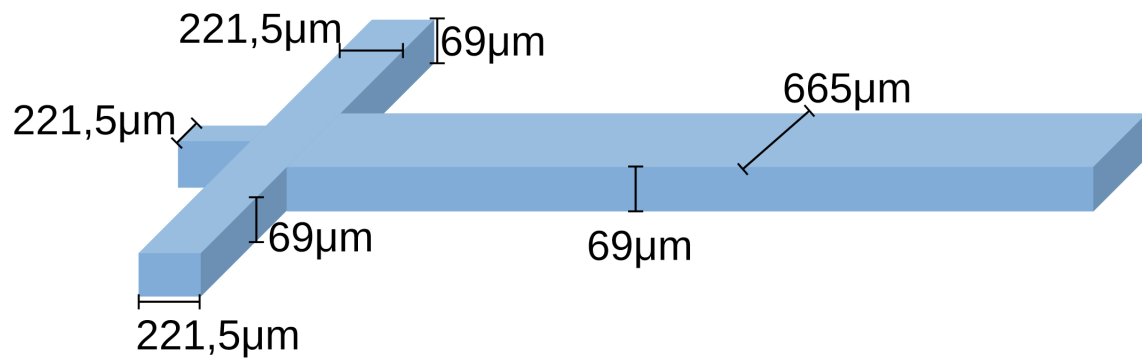

microchannel dimensions in  $\mu\text{m}$  measured with Dektak 3ST

**Fig. S5.** Dimensions of microfluidic channel used in our experiments as determined with a Dektak 3ST profilometer from the photoresist microstructure used for PDMS casting of the microfluidic chips.
